# Supplementary material for: NeuroRA: A Python Toolbox of Representational Analysis From Multi-Modal Neural Data
Source: Frontiers journal article supplement (doi:10.3389/fninf.2020.563669), 2020-12-23
Supplement: Presentation_1.pdf [file Presentation_1.pdf]

## Supplementary instructions for data conversion

### For EEG/MEG data

Users can use MATLAB toolbox such as EEGLab (<http://sccn.ucsd.edu/eeglab/>) to do preprocessing and obtain *.mat* files, then use SciPy (<https://www.scipy.org>) to load EEG data (*.mat*) as ndarray-type data. Sample codes:

```
>>> import scipy.io as sio
>>> data = sio.loadmat(filename)["data"]
```

Or users can use MNE (<https://mne-tools.github.io>) to do preprocessing and return ndarray-type data. Sample codes:

```
>>> # here epoch should be an Epoch object in MNE-Python
>>> data = epoch.get_data()
```

Also, for EEG data, users can use Neo (Garcia et al., 2014) (<https://neuralensemble.org/neo/>) to preprocess and return ndarray-type data. See more detail in Neo io module, and it provides many methods for reading different formats from different EEG acquisition systems.

### For fMRI data

We strongly recommend users to use Nibabel (<https://nipy.org/nibabel/>) to load fMRI data as ndarray-type data. Sample codes:

```
>>> import nibabel as nib
>>> data = nib.load(fmrifilename).get_fdata()
```

### For fNIRS data

For raw data from device, users can use Numpy (<http://www.numpy.org>) to load fNIRS data (*.txt* or *.csv*) as ndarray-type data. Sample codes:

```
>>> import numpy as np
>>> # load fNIRS data of .txt file as ndarray
>>> data = np.loadtxt(txtfilename)
>>> # load fNIRS data of .csv file as ndarray
>>> data = np.loadtxt(csvfilename, delimiter, usecols, unpack)
```

### For other sources of neuroelectrophysiological data

Users can use Brainstorm (<https://neuroimage.usc.edu/brainstorm/>) to

preprocess and obtain .mat files and then use SciPy to load ECoG data (.mat) as ndarray-type data.

Or users can use Neo (<https://neuralensemble.org/neo/>) to do preprocessing and return ndarray-type data. See more detail in Neo io module, and it provides many methods for reading different formats from different neuroelectrophysiology acquisition systems.

Also, users can use pyABF (<https://github.com/swharden/pyABF>) for Axon system, to load electrophysiology data (.abf) as ndarray-type data. Sample codes:

```
>>> import pyabf
>>> # the electrophysiology data file name with full address
>>> abf = pyabf.ABF("demo.abf")
>>> # access sweep data
>>> abf.setSweep(sweepNumber, channel)
>>> # get sweep data with sweepY
>>> data = abf.sweepY
```

## Notes

Two functions, *NumPy.reshape()* & *NumPy.transpose()*, are recommended for further data transformation.
