# Supplementary material for: NeuroRA: A Python Toolbox of Representational Analysis From Multi-Modal Neural Data
Source: Frontiers journal article supplement (doi:10.3389/fninf.2020.563669), 2020-12-23
Supplement: Table_2.pdf [file Table_2.pdf]

**Table S2 Basic structure of inputs and outputs of functions in *stats\_cal* module in NeuroRA.** The variable definitions are shown in Table S3.

|                                                                                                                                                                            |                                                                                                         |
|----------------------------------------------------------------------------------------------------------------------------------------------------------------------------|---------------------------------------------------------------------------------------------------------|
| <b>stats()</b>                                                                                                                                                             |                                                                                                         |
| – to conduct the statistical analysis for results of EEG-like data                                                                                                         |                                                                                                         |
| shape of input data:<br>[ <i>n_subs</i> , <i>n_chls</i> , <i>n_ts</i> , 2 <sup><i>b</i></sup> ]                                                                            | shape of output data:<br>[ <i>n_cons</i> , <i>n_cons</i> ]                                              |
| <b>stats_fmri()</b>                                                                                                                                                        |                                                                                                         |
| – to conduct the statistical analysis for results of fMRI data (searchlight)                                                                                               |                                                                                                         |
| shape of input data:<br>[ <i>n_subs</i> , <i>n_chls</i> , <i>n_ts</i> , 2 <sup><i>b</i></sup> ]                                                                            | shape of output data:<br>[ <i>n_cons</i> , <i>n_cons</i> ]                                              |
| <b>stats_iscfmri()</b>                                                                                                                                                     |                                                                                                         |
| – to conduct the statistical analysis for results of fMRI data (ISC searchlight)                                                                                           |                                                                                                         |
| shape of input data:<br>[ <i>n_ts</i> , <i>n_subs</i> /(2!×( <i>n_subs</i> -2)!), <i>n_x</i> ,<br><i>n_y</i> , <i>n_z</i> , 2 <sup><i>b</i></sup> ]                        | shape of output data:<br>[ <i>n_ts</i> , <i>n_x</i> , <i>n_y</i> , <i>n_z</i> , 2 <sup><i>b</i></sup> ] |
| <b>stats_stps()</b>                                                                                                                                                        |                                                                                                         |
| – to conduct the statistical analysis for results of EEG-like data (for STPS)                                                                                              |                                                                                                         |
| shape of input data:<br><i>corr1</i> : [ <i>n_subs</i> , <i>n_chls</i> , <i>n_ts</i> ]<br><i>corr2</i> : [ <i>n_subs</i> , <i>n_chls</i> , <i>n_ts</i> ]                   | shape of output data:<br>[ <i>n_chls</i> , <i>n_ts</i> , 2 <sup><i>b</i></sup> ]                        |
| <b>stats_stpsfmri()</b>                                                                                                                                                    |                                                                                                         |
| – to conduct the statistical analysis for results of fMRI data (searchlight)                                                                                               |                                                                                                         |
| shape of input data:<br><i>corr1</i> : [ <i>n_subs</i> , <i>n_x</i> , <i>n_y</i> , <i>n_z</i> ]<br><i>corr2</i> : [ <i>n_subs</i> , <i>n_x</i> , <i>n_y</i> , <i>n_z</i> ] | shape of output data:<br>[ <i>n_x</i> , <i>n_y</i> , <i>n_z</i> , 2 <sup><i>b</i></sup> ]               |
