# Supplementary material for: NeuroRA: A Python Toolbox of Representational Analysis From Multi-Modal Neural Data
Source: Frontiers journal article supplement (doi:10.3389/fninf.2020.563669), 2020-12-23
Supplement: Table_3.pdf [file Table_3.pdf]

**Table S3 Definitions of the variables in Table S1 and Table S2.**

| <b>Variable</b>    | <b>Definition</b>                                                     |
|--------------------|-----------------------------------------------------------------------|
| $2^a$              | 2 conditions (to calculate the NPS)                                   |
| $n\_subs$          | the number of subjects                                                |
| $n\_trials$        | the number of trials                                                  |
| $n\_chls$          | the number of channels                                                |
| $n\_ts$            | the number of time-points                                             |
| $time\_window$     | the number of time-points in each time interval for the calculation   |
| $time\_step$       | the number of time-points in each time step for calculation           |
| $2^b$              | 2 values, including an $r$ -value and a $p$ -value                    |
| $nx, ny, nz$       | the size of fMRI-img                                                  |
| $n\_x, n\_y, n\_z$ | the number of calculation unit for searchlight along the x, y, z axis |
| $8^*$              | 8 conditions for comparing (after calculating the STPS)               |
| $n\_cons$          | the number of conditions                                              |
